# Supplementary material
Source: PubMed Central journal article supplement (PMC3155264)

Fig. S1

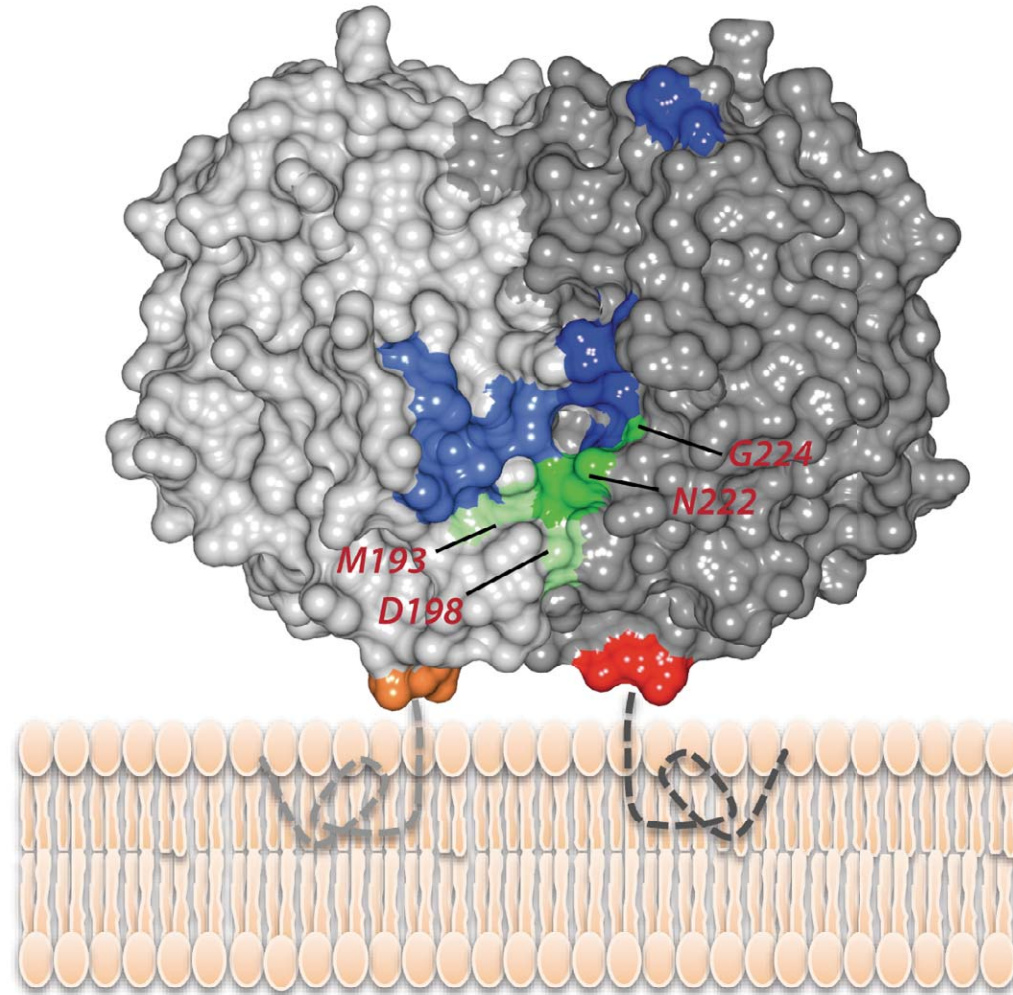

Fig. S2

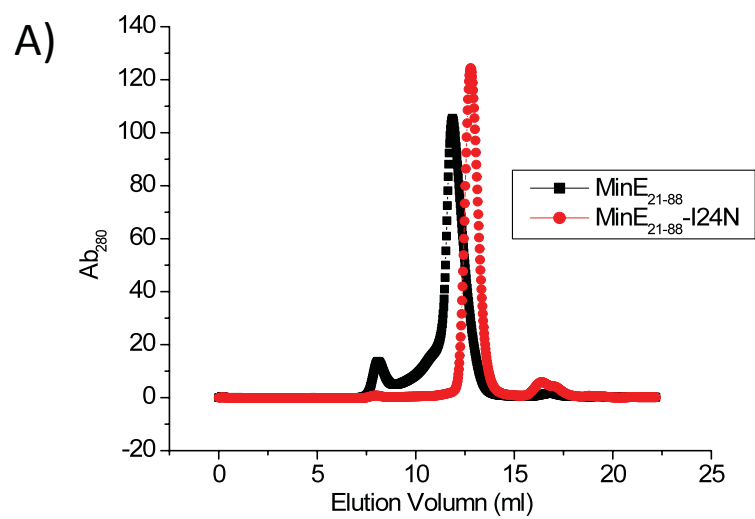

B)

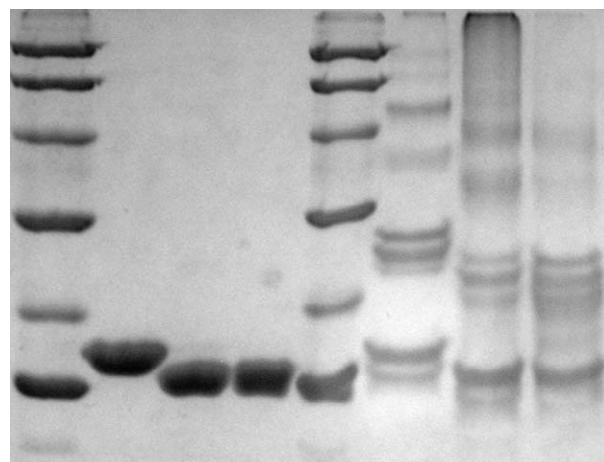

1 2 3  
- HCHO

1 2 3  
+ HCHO

1. MinE<sup>1-88</sup> HIS (6x)
2. MinE<sup>21-88</sup> HIS (6x)
3. MinE<sup>21-88</sup> [I24N]HIS (6x)

Supplement: NIHMS309933-supplement-02.pdf [file NIHMS309933-supplement-02.pdf]
